# Supplementary material for: Structure determination of Ba5AlF13by coupling electron, synchrotron and neutron powder diffraction, solid-state NMR and ab initio calculations
Source: Royal Society of Chemistry journal article supplement (doi:10.1039/c6dt02454h), 2016-01-01
Supplement: c6dt02454h1.pdf [file c6dt02454h1.pdf]

# Structure determination of Ba<sub>5</sub>AlF<sub>13</sub> by coupling electron, synchrotron and neutron powder diffraction, solid-state NMR and ab initio calculations†

Charlotte Martineau, Mathieu Allix, Matthew R. Suchomel, Florence Porcher, François Vivet, Christophe Legein, Monique Body, Dominique Massiot, Francis Taulelle and Franck Fayon

## Electronic Supplementary Information.

### Table of content

|                                                                                                                                                                                                                                           |   |
|-------------------------------------------------------------------------------------------------------------------------------------------------------------------------------------------------------------------------------------------|---|
| <b>Fig. S1</b> Experimental and calculated room-temperature SPD patterns of Ba <sub>5</sub> AlF <sub>13</sub> .....                                                                                                                       | 2 |
| <b>Table S1</b> Atomic coordinates of Ba <sub>5</sub> AlF <sub>13</sub> (SPD data, NPD ordered).....                                                                                                                                      | 3 |
| <b>Table S2</b> Al-F distances in Ba <sub>5</sub> AlF <sub>13</sub> .....                                                                                                                                                                 | 3 |
| <b>Table S3</b> Ba-F distances in Ba <sub>5</sub> AlF <sub>13</sub> .....                                                                                                                                                                 | 4 |
| <b>Fig. S2</b> Correlation between the <sup>19</sup> F GIPAW calculated shieldings and experimental isotropic chemical shift values for BaF <sub>2</sub> , Ba <sub>5</sub> Al <sub>3</sub> F <sub>19</sub> and β-BaAlF <sub>5</sub> ..... | 5 |
| <b>Fig. S3</b> Residual density on difference Fourier maps obtained for different approximation models of the thermal parameter of F3.....                                                                                                | 6 |
| <b>Table S4</b> Comparison of the final reliability factors and number of independent thermal parameters for the different refinement models.....                                                                                         | 6 |
| <b>Table S5</b> Gram-Charlier expansion parameters (third and fourth order anharmonic tensors.....                                                                                                                                        | 7 |
| <b>Table S6</b> Atomic coordinates of Ba <sub>5</sub> AlF <sub>13</sub> (NPD disordered anharmonic).....                                                                                                                                  | 7 |

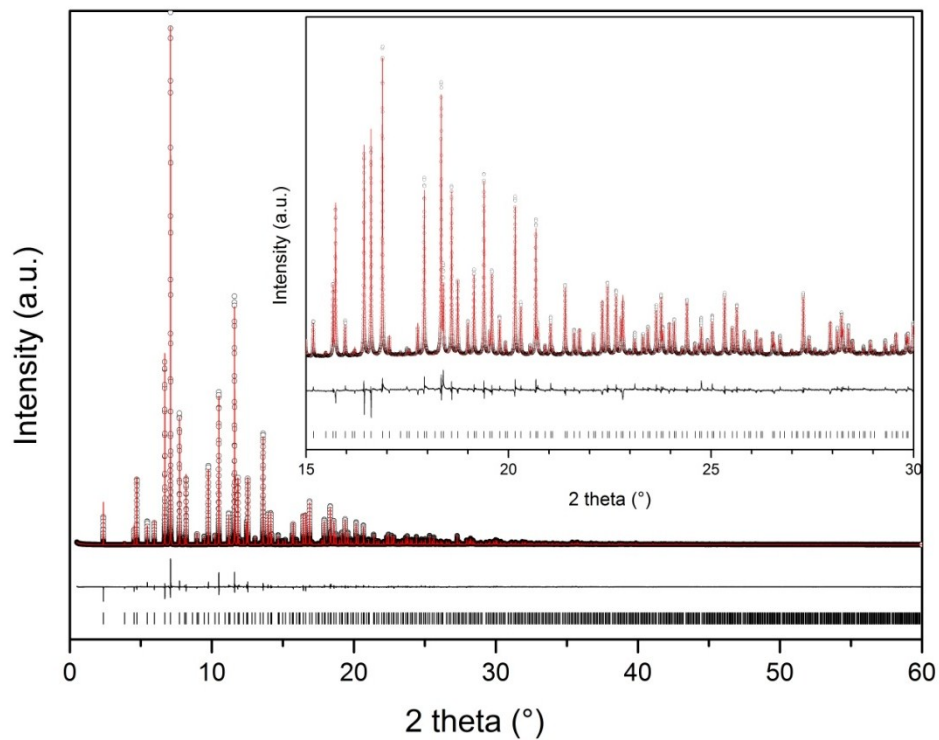

**Fig. S1.** Experimental (dots) and calculated (red line) room-temperature SPD patterns of Ba<sub>5</sub>AlF<sub>13</sub>. The Bragg positions (vertical ticks) and the difference between the experimental and calculated data are shown. The fit statistics are:  $R_p = 6.07\%$ ,  $R_{wp} = 8.93\%$ ,  $R_{Bragg} = 4.79\%$ .

**Table S1.** Atomic coordinates of Ba<sub>5</sub>AlF<sub>13</sub> according to the experimental SPD and NPD data (SPD, NPD) after geometry optimization (SPD\_GO), in the ordered model.

|        | Atom | Site | Occupancy | Symmetry | x         | y         | z         |
|--------|------|------|-----------|----------|-----------|-----------|-----------|
| SPD    | Al1  | 16d  | 1         | -3m      | 0.5       | 0.5       | 0.5       |
| SPD_GO |      |      |           |          | 0.5       | 0.5       | 0.5       |
| NPD    |      |      |           |          | 0.5       | 0.5       | 0.5       |
| SPD    | Ba1  | 32e  | 1         | 3m       | 0.2898(2) | 0.2898(2) | 0.2898(2) |
| SPD_GO |      |      |           |          | 0.2899    | 0.2899    | 0.2899    |
| NPD    |      |      |           |          | 0.2898(2) | 0.2898(2) | 0.2898(2) |
| SPD    | Ba2  | 48f  | 1         | 2.mm     | 0.0718(3) | 1/8       | 1/8       |
| SPD_GO |      |      |           |          | 0.06618   | 1/8       | 1/8       |
| NPD    |      |      |           |          | 0.0717(3) | 1/8       | 1/8       |
| SPD    | F1   | 96g  | 1         | mm       | 0.4789(2) | 0.4789(2) | 0.1417(2) |
| SPD_GO |      |      |           |          | 0.4786    | 0.4786    | 0.1411    |
| NPD    |      |      |           |          | 0.4786(2) | 0.4786(2) | 0.1409(2) |
| SPD    | F2   | 96g  | 1         | mm       | 0.3192(1) | 0.3192(1) | 0.5357(2) |
| SPD_GO |      |      |           |          | 0.3195    | 0.3195    | 0.5358    |
| NPD    |      |      |           |          | 0.3198(1) | 0.3198(1) | 0.5353(2) |
| SPD    | F3   | 8a   | 1         | -43m     | 1/8       | 1/8       | 1/8       |
| SPD_GO |      |      |           |          | 1/8       | 1/8       | 1/8       |
| NPD    |      |      |           |          | 1/8       | 1/8       | 1/8       |
| SPD    | F4   | 8b   | 1         | -43m     | 3/8       | 3/8       | 3/8       |
| SPD_GO |      |      |           |          | 3/8       | 3/8       | 3/8       |
| NPD    |      |      |           |          | 3/8       | 3/8       | 3/8       |

**Table S2.** Al-F distances (Å) in Ba<sub>5</sub>AlF<sub>13</sub> according to the experimental SPD and NPD data (SPD, NPD) after geometry optimization (SPD\_GO) in the ordered model.

|        |       |     |       |
|--------|-------|-----|-------|
| SPD    | 1.812 | NPD | 1.823 |
| SPD_GO | 1.818 |     |       |

**Table S3.** Ba-F distances (Å) in Ba<sub>5</sub>AlF<sub>13</sub> according to the experimental SPD and NPD data (SPD, NPD) after geometry optimization (SPD\_GO) in the ordered model.

| Ba1    |       |     |       |
|--------|-------|-----|-------|
| SPD    | 2.565 | NPD | 2.565 |
|        | 2.631 |     | 2.612 |
|        | 2.827 |     | 2.815 |
| SPD_GO | 2.564 |     |       |
|        | 2.627 |     |       |
|        | 2.825 |     |       |
| Ba2    |       |     |       |
| SPD    | 2.703 | NPD | 2.706 |
|        | 2.824 |     | 2.821 |
|        | 2.833 |     | 2.830 |
| SPD_GO | 2.677 |     |       |
|        | 2.861 |     |       |
|        | 2.914 |     |       |

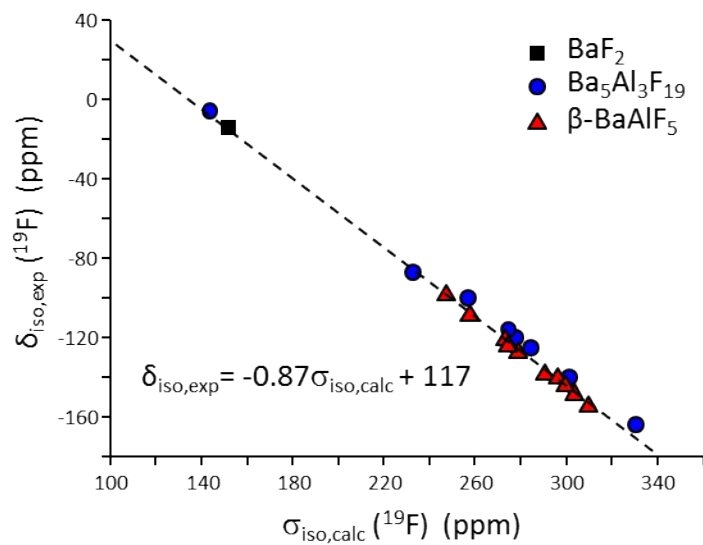

**Fig. S2** Correlation between the <sup>19</sup>F GIPAW calculated isotropic shieldings and experimental isotropic chemical shift values for BaF<sub>2</sub> (black squares), Ba<sub>5</sub>Al<sub>3</sub>F<sub>19</sub> (blue circles) and β-BaAlF<sub>5</sub> (red triangles). The dashed line is the linear regression:  $\delta_{\text{iso,exp}}/\text{CFCl}_3 = -0.87 \sigma_{\text{iso,calc}} + 117$  ( $R^2 = 0.993$ ).

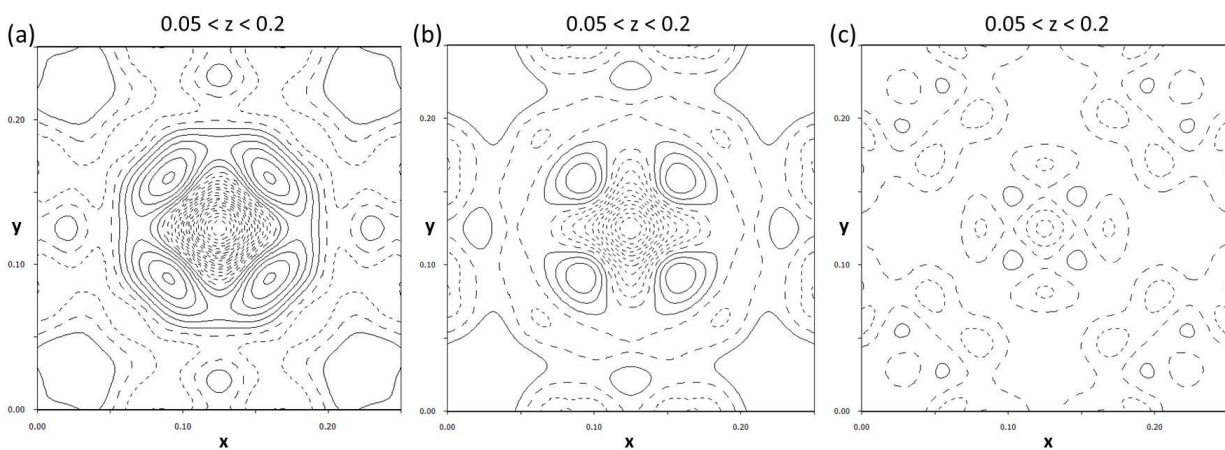

**Fig. S3** Residual density on difference Fourier maps obtained for different approximation models of the thermal parameter of F3: (a) harmonic anisotropic, (b) anharmonic third order and (c) anharmonic fourth order.

**Table S4** Comparison of the final reliability factors and number of independent thermal parameters for the different refinement models.

|                                           | Number of independent thermal parameters | GOF (%) | $R_p$ (%) | $wR_p$ (%) |
|-------------------------------------------|------------------------------------------|---------|-----------|------------|
| Harmonic anisotropic 32e site             | 2                                        | 1.63    | 2.59      | 3.30       |
| Anharmonic 3 <sup>rd</sup> order 32e site | 6                                        | 1.54    | 2.45      | 3.11       |
| Anharmonic 4 <sup>th</sup> order 32e site | 7                                        | 1.37    | 2.20      | 2.78       |

**Table S5** Gram-Charlier expansion parameters (third and fourth order anharmonic tensors ( $\times 10^2$ )) for  $\text{Ba}_5\text{AlF}_{13}$ .

| <i>Atom</i> | <i>C111</i> | <i>C112</i> | <i>C113</i> | <i>C122</i> | <i>C123</i> | <i>C133</i> | <i>C222</i> | <i>C223</i> | <i>C233</i> | <i>C333</i> |
|-------------|-------------|-------------|-------------|-------------|-------------|-------------|-------------|-------------|-------------|-------------|
| <b>F3</b>   | -3.4921     | -5.4514     | -5.4514     | -5.4514     | -6.1281     | -5.4514     | -3.4921     | -5.4514     | -5.4514     | -3.4921     |

Equations due to the site symmetry  $32e$  for F3:  $C111=C222=C333$  ;  $C112=C113=C122=C133=C223$ .

| <i>Atom</i> | <i>D1111</i> | <i>D1112</i> | <i>D1113</i> | <i>D1122</i> | <i>D1123</i> | <i>D1133</i> | <i>D1222</i> | <i>D1223</i> | <i>D1233</i> | <i>D1333</i> |
|-------------|--------------|--------------|--------------|--------------|--------------|--------------|--------------|--------------|--------------|--------------|
| <b>F3</b>   | 4.4035       | -9.634       | -9.634       | -4.2394      | -1.5601      | -4.2394      | -9.634       | -1.5601      | -1.5601      | -9.634       |

| <i>D2222</i> | <i>D2223</i> | <i>D2233</i> | <i>D2333</i> | <i>D3333</i> |
|--------------|--------------|--------------|--------------|--------------|
| 4.4035       | -9.634       | -4.2394      | -9.634       | 4.4035       |

Equations due to the site symmetry  $32e$  for F3:  $D1111=D2222=D3333$  ;  
 $D1112=D1113=D1222=D1333=D2223=D2333$  ;  $D1122=D1133=D2233$  ;  $D1123=D1223=D1233$

**Table S6** Atomic coordinates of  $\text{Ba}_5\text{AlF}_{13}$  resulting from anharmonic 4<sup>th</sup> order Rietveld refinement of the NPD data.

| Atom | Site        | Occupancy | Symmetry | x         | y         | z         |
|------|-------------|-----------|----------|-----------|-----------|-----------|
| Al1  | 16 <i>d</i> | 1         | -3m      | 0.5       | 0.5       | 0.5       |
| Ba1  | 32 <i>e</i> | 1         | 3m       | 0.2902(2) | 0.2902(2) | 0.2902(2) |
| Ba2  | 48 <i>f</i> | 1         | 2.mm     | 0.0723(2) | 1/8       | 1/8       |
| F1   | 96 <i>g</i> | 1         | mm       | 0.4768(1) | 0.4768(1) | 0.1438(2) |
| F2   | 96 <i>g</i> | 1         | mm       | 0.3194(1) | 0.3194(1) | 0.5353(2) |
| F3   | 32 <i>e</i> | 0.25      | 3m       | 0.099(4)  | 0.099(4)  | 0.099(4)  |
| F4   | 8 <i>b</i>  | 1         | -43m     | 3/8       | 3/8       | 3/8       |
